# Supplementary material
Source: PubMed Central journal article supplement (PMC4793852)
Supplement: kurf019852.ww1_default.pdf [file kurf019852.ww1_default.pdf]

**Appendix Table 1- Study Sites**

---

|                                                            |
|------------------------------------------------------------|
| Bay State Medical Center, Springfield, MA                  |
| Baylor Health Plano Heart Hospital, Plano, TX              |
| Henry Ford Hospital, Detroit, MI                           |
| Integrus Heart Hospital, Oklahoma City, OK                 |
| Kaiser-Permanente, San Francisco, CA                       |
| Mayo Clinic, Rochester, MN                                 |
| Prairie Heart St John's Hospital, Springfield, IL          |
| Washington University Barnes-Jewish Hospital, St Louis, MO |
| Yale New Haven Hospital, New Haven, CT                     |
| Saint Luke's Mid America Heart Institute, Kansas City, MO  |

**Appendix Table 2 - Number of patients and interventional cardiologists (operators) at each study site**

| <b>Site</b> | <b>Number of Patients</b> | <b>Number of Operators</b> |
|-------------|---------------------------|----------------------------|
| 1           | 113                       | 9                          |
| 2           | 143                       | 19                         |
| 3           | 20                        | 8                          |
| 4           | 129                       | 5                          |
| 5           | 91                        | 13                         |
| 6           | 160                       | 17                         |
| 7           | 67                        | 12                         |
| 8           | 158                       | 32                         |
| 9           | 66                        | 13                         |
| 10          | 44                        | 7                          |

**Appendix Table 3**Odds ratio<sup>†</sup> of association between patient and operator characteristic(s) and patient perception(s)

|                                        | Extend Life           | Prevent MI            | Save Life             | Decrease Symptoms     | Improve Abnormality   | Other                | Emergent Procedure    |
|----------------------------------------|-----------------------|-----------------------|-----------------------|-----------------------|-----------------------|----------------------|-----------------------|
| <b><i>Patient Characteristics</i></b>  |                       |                       |                       |                       |                       |                      |                       |
| Age (per +10y)                         | 0.84 (0.67 to 1.05)   | 0.77 (0.63 to 0.95)** | 0.85 (0.72 to 0.99)** | 0.84 (0.71 to 0.98)** | 0.90 (0.79 to 1.03)   | 1.16 (0.89 to 1.50)  | 0.92 (0.78 to 1.09)   |
| Female                                 | 0.90 (0.54 to 1.52)   | 1.31 (0.79 to 2.16)   | 0.90 (0.62 to 1.30)   | 0.72 (0.49 to 1.05)   | 1.08 (0.78 to 1.48)   | 0.53 (0.26 to 1.08)  | 1.39 (0.94 to 2.07)   |
| Non-Caucasian                          | 1.35 (0.52 to 3.47)   | 1.63 (0.63 to 4.25)   | 1.57 (0.79 to 3.10)   | 1.46 (0.76 to 2.84)   | 0.79 (0.47 to 1.34)   | 0.51 (0.16 to 1.62)  | 1.15 (0.61 to 2.14)   |
| No insurance                           | 2.26 (0.29 to 17.51)  | 0.37 (0.13 to 1.07)   | 0.99 (0.34 to 2.86)   | 0.54 (0.19 to 1.50)   | 1.27 (0.51 to 3.19)   | 0.06 (0.00 to 192.6) | 0.45 (0.12 to 1.72)   |
| Prior PCI                              | 0.74 (0.46 to 1.19)   | 0.70 (0.45 to 1.09)   | 0.83 (0.60 to 1.16)   | 1.06 (0.75 to 1.50)   | 0.73 (0.55 to 0.98)** | 1.08 (0.62 to 1.87)  | 0.96 (0.67 to 1.39)   |
| Prior CABG                             | 1.70 (0.91 to 3.15)   | 1.53 (0.88 to 2.66)   | 1.16 (0.79 to 1.71)   | 1.06 (0.71 to 1.59)   | 0.83 (0.59 to 1.16)   | 0.95 (0.50 to 1.80)  | 1.06 (0.69 to 1.61)   |
| Prior MI                               | 0.98 (0.58 to 1.67)   | 1.64 (0.97 to 2.79)   | 1.04 (0.72 to 1.51)   | 0.72 (0.49 to 1.06)   | 0.81 (0.58 to 1.12)   | 0.87 (0.47 to 1.59)  | 1.22 (0.81 to 1.83)   |
| Married                                | 1.13 (0.68 to 1.88)   | 1.66 (1.04 to 2.63)** | 0.78 (0.54 to 1.13)   | 1.05 (0.73 to 1.52)   | 1.10 (0.81 to 1.51)   | 1.53 (0.78 to 2.97)  | 0.74 (0.50 to 1.09)   |
| Less than HS education                 | 1.43 (0.61 to 3.40)   | 0.90 (0.45 to 1.83)   | 1.11 (0.62 to 1.96)   | 0.59 (0.33 to 1.07)   | 0.60 (0.35 to 1.00)   | 0.54 (0.16 to 1.85)  | 2.18 (1.24 to 3.85)** |
| Avoided care due to cost               | 1.36 (1.03 to 1.78)** | 1.26 (0.96 to 1.66)   | 1.12 (0.90 to 1.39)   | 1.13 (0.90 to 1.41)   | 0.96 (0.80 to 1.16)   | 0.96 (0.65 to 1.41)  | 0.95 (0.75 to 1.19)   |
| SAQ Score (per +5 pts)                 | 1.01 (0.96 to 1.07)   | 1.04 (0.99 to 1.10)   | 0.97 (0.93 to 1.01)   | 0.75 (0.71 to 0.78)** | 1.03 (1.00 to 1.07)   | 1.02 (0.95 to 1.09)  | 0.96 (0.92 to 1.00)   |
| <b><i>Operator Characteristics</i></b> |                       |                       |                       |                       |                       |                      |                       |
| Age (per +10y)                         | 1.49 (1.08 to 2.05)** | 1.10 (0.82 to 1.48)   | 1.11 (0.90 to 1.35)   | 1.22 (0.99 to 1.51)   | 1.06 (0.89 to 1.27)   | 0.91 (0.61 to 1.36)  | 1.02 (0.80 to 1.30)   |
| Non-US/Canada med school               | 1.05 (0.56 to 1.96)   | 1.24 (0.68 to 2.25)   | 0.90 (0.60 to 1.34)   | 1.03 (0.70 to 1.53)   | 1.18 (0.84 to 1.66)   | 0.72 (0.32 to 1.64)  | 1.34 (0.84 to 2.13)   |
| Cardiology board certification         | 0.45 (0.09 to 2.19)   | 0.69 (0.17 to 2.86)   | 0.50 (0.18 to 1.37)   | 0.75 (0.25 to 2.20)   | 1.80 (0.76 to 4.30)   | 0.67 (0.11 to 4.24)  | 1.56 (0.51 to 4.80)   |
| Interventional board certification     | 2.15 (0.89 to 5.21)   | 1.29 (0.52 to 3.21)   | 1.27 (0.69 to 2.34)   | 0.76 (0.42 to 1.36)   | 0.78 (0.46 to 1.30)   | 1.02 (0.35 to 3.01)  | 0.94 (0.49 to 1.81)   |

Publications (vs. none)

|       |                      |                      |                      |                      |                      |                      |                      |
|-------|----------------------|----------------------|----------------------|----------------------|----------------------|----------------------|----------------------|
| 1-9   | 1.09 ( 0.52 to 2.31) | 0.63 ( 0.29 to 1.38) | 1.05 ( 0.64 to 1.72) | 0.96 ( 0.60 to 1.55) | 1.13 ( 0.75 to 1.71) | 0.97 ( 0.41 to 2.31) | 0.89 ( 0.51 to 1.55) |
| 10-49 | 0.96 ( 0.38 to 2.40) | 0.68 ( 0.27 to 1.68) | 0.66 ( 0.36 to 1.19) | 0.89 ( 0.49 to 1.63) | 1.07 ( 0.63 to 1.79) | 0.49 ( 0.16 to 1.50) | 1.19 ( 0.58 to 2.42) |
| ≥50   | 1.21 ( 0.41 to 3.54) | 1.23 ( 0.44 to 3.46) | 1.01 ( 0.51 to 2.01) | 0.76 ( 0.39 to 1.50) | 1.42 ( 0.79 to 2.56) | 1.00 ( 0.29 to 3.46) | 1.69 ( 0.76 to 3.77) |

† 95% Confidence Intervals displayed next to each Odds Ratio

\*\* $p < 0.05$

**Appendix Figure 1 - Patient interview questions regarding the urgency of their PCI procedure and its' benefits.**

---

27. Was your coronary artery balloon or stent placement an elective procedure or was it an emergency?

Elective                      Emergency                      Unsure  
                                                                           

---

28. What do you think were the main benefits of your procedure? (Check all that apply.)

- |                                                                    |                                                                     |
|--------------------------------------------------------------------|---------------------------------------------------------------------|
| <input type="checkbox"/> To prevent future heart attacks           | <input type="checkbox"/> To improve an abnormality on a stress test |
| <input type="checkbox"/> To extend my life                         | <input type="checkbox"/> Other (specify: _____ )                    |
| <input type="checkbox"/> To save my life                           | <input type="checkbox"/> Unsure                                     |
| <input type="checkbox"/> To decrease anginal symptoms (chest pain) |                                                                     |
-
